# Supplementary material
Source: HighWire-hosted journal article supplement (https://cmaj.ca/highwire/filestream/99472/field_highwire_adjunct_files/0/210873-res-1-at.pdf)
Supplement: 210873-res-1-at.pdf [file 210873-res-1-at.pdf]

# Covid19 Details

Record ID

---

Study site

- Edmonton
- Ottawa
- London
- Montreal Children's
- Quebec City
- Kingston
- Vancouver
- Winnipeg
- Saskatoon
- Toronto
- St John's
- Calgary
- Tehran
- Hamilton
- Ste Justine
- Mississauga
- Guayquil
- Costa Rica
- Halifax

Date of birth (MM-YYYY) - uofa\_partial\_date\_mm\_yyyy

---

Was the child < 90 days old on the date that COVID-19 was first detected or MIS-C diagnosed?

- Yes
- No

How many days old was the infant on the date that COVID was detected or MIS-C diagnosed (If born March 4, count as 2 days old on March 6)?

---

Gender

- Male
- Female
- Unknown

Date of hospital admission (D-M-Y)

---

Which best describes the role of SARS-CoV-2 for this admission?  
Choose the first option if they were suspected to have COVID/ MIS-C at admission and had positive PCR or serology.  
Choose the second option if they had incidental SARS-CoV-2 infection.  
Choose the third option if i) they were admitted with another suspected diagnosis but in retrospect had COVID/MIS-C or ii) had nosocomial SARS-CoV-2  
Choose the fourth option if they had MIS-C with negative PCRs and serology (or tests not done).

- The primary reason for admission was COVID-19 infection.
- The child was admitted for other reasons and also had COVID-19 but this did not prolong their hospital stay
- The child was admitted for other reasons and also had COVID-19 which prolonged their hospital stay
- The child was admitted for what turned out to be probable MIS-C and did not have proven COVID-19.
- The child was admitted with known SARS-CoV-2 infection but only because they could not isolate at home

Which best describes this case?

- MIS-C
- acute COVID-19
- incidental SARS-CoV-2 infection

Explain the main reason for the admission and why you think that COVID did not prolong the admission (eg. The child was admitted with proven appendicitis and never required oxygen. CXR never done.)

---

Do not complete the remainder of the form unless the children received some treatment for COVID (IVIG/ medication/ oxygen/ other) or you think that COVID played an important role in the admission.

Describe the primary reason for admission, the evidence that COVID-19 prolonged the admission and your estimate of how many days it prolonged admission for. (eg. child admitted with cellulitis - COVID19 detected at admission - child stayed in hospital 5 days as required oxygen - would have likely gone home day 2 if just had the cellulitis so admission prolonged by 3 days)

---

First three digits of postal code (Put NA for hospitals outside of Canada)

---

Has the child been discharged to their home (Choose 'no' if went to a rehabilitation facility)?

- Yes  
 No

Where is the child now?  
If "still in your hospital", please come back later and change the answer if the child eventually is discharged.

- still in your hospital  
 went to rehabilitation hospital  
 transferred to another acute care hospital

Date of hospital discharge (D-M-Y)

---

Did the child die during this admission?

- Yes  
 No

Number of days after admission that child died (If child was admitted May 5 and died May 15, put 10).

---

Role that COVID-19 played in death

- child would not have died had they not got COVID-19 infection  
 child might have died anyway but COVID-19 infection may have hastened death  
 COVID-19 infection probably played no role in death

Cause of death

---

Was SARS-CoV-2 infections hospital acquired? This is defined as onset of symptoms 7 days or more after admission with first detection of virus 7 days or more after admission.

- Yes  
 No

Date of sample(s) from which SARS-CoV-2 first detected (D-M-Y) - Put NA if not detected from any site.

---

When did the COVID-19 infection start (earliest date that child had symptoms (or viral detection if never symptomatic)?

- In retrospect the child probably had COVID-19 symptoms at admission even though it was not suspected.
- COVID-19 symptoms probably started after admission.
3. never got any symptoms

Which underlying conditions does this child have (choose all that apply)?

- none
- preterm birth (< 37 weeks GA)
- congenital immunodeficiency
- HIV
- cancer
- other condition requiring parenteral immunosuppressive drugs (including corticosteroids for asthma) in the preceding 6 weeks
- hemodynamically significant congenital heart disease
- cardiomyopathy/ myocarditis
- asthma
- CF
- chronic lung disease from etiology other than CF
- seizure disorder
- chromosomal disorder
- diabetes mellitus
- sickle cell disease
- chronic renal failure requiring dialysis
- on chronic NSAIDs (usually for a rheumatologic condition)
- on ACE inhibitors (usually for hypertension)
- hypertension
- obesity
- other

Which of the following did the child have prior to COVID-19/MIS-C (Choose all that apply)?

- Was on oxygen at least part of the day at home
- tracheostomy
- non-invasive ventilation (CPAP/BIPAP) at least part of the day
- on a traditional ventilator at least part of the day
- tube fed
- home TPN
- CSF shunt (most commonly VP shunt)
- ostomy for stool
- none

What type of cancer does the child have? When did they last receive chemotherapy?

\_\_\_\_\_

Which applies to the child's asthma?

- only on therapy (such as salbutamol or inhaled steroids) for exacerbations
- on continuous therapy

Type of chronic lung disease

- non-CF bronchiectasis
- chronic lung disease of prematurity
- chronic lung disease from aspiration
- other

What is the cause of the chronic lung disease?

\_\_\_\_\_

---

Type of diabetes mellitus

- insulin dependent  
 non-insulin dependent
- 

Provide more details about the underlying medical condition (eg. has Trisomy 21 with no congenital heart disease or other comorbidities)

---

Provide details of any other underlying medical condition.

---

Routine immunizations (not including influenza vaccine)

- up to date for age  
 not up to date for age  
 not recorded in chart
- 

What routine immunizations has the child received? (eg. They received routine 2 and 4 month vaccines but none since).

---

MRSA status

- colonized this admission  
 not colonized this admission  
 not tested for colonization this admission
- 

Use of NSAIDS

- On regular NSAIDS prior to COVID-19 infection (typically for a rheumatologic condition)  
 Received at least one dose of NSAIDS during COVID-19 infection  
 Did not receive NSAIDS during COVID-19 infection  
 Did not receive NSAIDS in hospital but might have at home prior to admission
- 

Where was COVID-19 first detected from (Choose more than one if multiple sites positive on the same day)?

- nasopharyngeal specimen  
 swab of the nose  
 throat swab  
 ETT aspirate  
 stool  
 blood  
 other site  
 diagnosis based on positive serology alone  
 COVID-19 not detected and serology not done but enrolled as meets criteria for MIS-C syndrome  
 COVID-19 not detected and serology negative but enrolled as meets criteria for MIS-C syndrome
- 

The virus was

- wild type  
 variant B1.1.7  
 variant P.1  
 variant P.2  
 variant B.1.617  
 variant B.1.351  
 other variant  
 N501Y detected but variant not determined  
 not typed

The MIS-C criteria require likely contact with COVID-19. Explain the contact. (eg. household contact with proven case 10 days prior to symptom onset OR No known specific contact but there were new cases occurring daily in the city where they live at the time they presented).

---

From what other site was SARS-CoV-2 detected?

---

Were any other samples positive after the first sample?

- Yes  
 No

Date of first negative sample (D-M-Y) - Put ND if never done.

---

Please provide dates and results of all negative and positive SARS-CoV-2 testing done during this illness (eg. May 4- NPA pos; May 6 - ETT neg; May 8 - NPA pos; then no further testing)

---

Results of serology for SARS-CoV-2

- Not done  
 Done and always negative  
 Positive at least once

For the positive serology, provide dates and as much information as you can about the test that was done and the IgM and IgG results.

---

Highest level of care required for COVID-19 infection or MIS-C

- regular ward only - did not need oxygen  
 regular ward only - needed oxygen  
 regular ward only - needed high flow nasal cannula (HFNC)  
 regular ward only - needed non-invasive ventilation (CPAP/BiPAP)  
 COVID ward - did not need oxygen  
 COVID ward - needed oxygen  
 COVID ward - needed HFNC  
 COVID ward - needed non-invasive ventilation (CPAP/BiPAP)  
 ICU for telemetry only - no oxygen or vasopressors  
 ICU for management of impending shock but never needed inotropes or oxygen  
 ICU - needed vasopressors only  
 ICU - needed oxygen only  
 ICU - needed oxygen and vasopressors only  
 ICU - needed HFNC  
 ICU - needed non-invasive ventilation (CPAP/BiPAP)  
 ICU - needed mechanical ventilation  
 ICU - needed ECMO  
 Was on ward for other reasons and level of care required did not change during COVID-19 infection  
 Was in ICU for other reasons and level of care required did not change during COVID-19 infection

Did the patient have more than one ICU stay during their COVID-19 infection (or MIS-C)?

- Yes  
 No

Date of initial ICU admission (D-M-Y)

---

Date of initial ICU discharge (D-M-Y)

---

Provide ICU admission and discharge dates for the second and subsequent admissions and an explanation for each (eg. Went to ward June 6 but then had a prolonged seizure June 7 so back in ICU June 7-8).

---

Did the patient require vasoactive infusions (including inotropes) such as epinephrine or norepinephrine during COVID-19 infection or MIS-C?

- Yes  
 No

**Coinfections - Which of the following occurred during the time that the child had COVID-19 infection? If none, you can leave this blank - no need to select "no" for each.**

|                                                                                                      | yes                      | no                       |
|------------------------------------------------------------------------------------------------------|--------------------------|--------------------------|
| positive blood culture thought to be a contaminant (not treated with full course of antibiotics)     | <input type="checkbox"/> | <input type="checkbox"/> |
| blood culture thought to be truly positive                                                           | <input type="checkbox"/> | <input type="checkbox"/> |
| positive ETT cultures treated with antibiotics for presumptive bacterial pneumonia                   | <input type="checkbox"/> | <input type="checkbox"/> |
| positive ETT cultures thought to be colonization only so not treated with full course of antibiotics | <input type="checkbox"/> | <input type="checkbox"/> |
| positive bacterial culture from another site treated with antibiotics                                | <input type="checkbox"/> | <input type="checkbox"/> |
| respiratory viral coinfection                                                                        | <input type="checkbox"/> | <input type="checkbox"/> |
| other infection                                                                                      | <input type="checkbox"/> | <input type="checkbox"/> |

Provide details of the "other infection".

---

Provide details of the coinfection (eg. RSV pos May 4; BC grew MSSA May 6 so received 10 days cloxacillin)

---

Which is true?

- The patient did not receive antibiotics this admission.  
 The patient received antibiotics for possible secondary bacterial pneumonia.  
 The patient received antibiotics for another reason.

What was the indication for antibiotics?

---

Choose all that are true regarding chest imaging during the COVID-19 infection

- The child did not have any chest imaging performed
- All CXRs were normal or showed findings not related to COVID-19 (chronic changes for example)
- The child had one or more abnormal CXRs with findings possibly related to COVID-19
- CT chest was always normal or showed findings not related to COVID-19
- The child had one or more abnormal CTs with findings possibly related to COVID-19

What did the CXR show? Choose all that apply

- Ground glass appearance
- Local patchy infiltrates
- Bilateral patchy infiltrates
- Lobar infiltrate(s)
- Interstitial changes
- other

What were the other CXR findings?

\_\_\_\_\_

Summarize relevant CT chest findings, including presence or absence of ground glass appearance

\_\_\_\_\_

Did the child receive an anti-viral for influenza (typically oseltamivir at admission)?

- Yes
- No

Did the child receive any other drug or therapy directed at treatment of COVID-19 or its sequelae? Choose all that apply.

- lopinavir-ritonavir (Kaletra)
- hydroxychloroquine (Plaquenil)
- remdesivir
- tocilizumab
- plasmapheresis
- convalescent plasma
- IVIG
- other
- none of the above

How many doses of IVIG did the child receive?

- 1
- 2
- 3
- 4 or more

Date of first IVIG infusion (D-M-Y)

\_\_\_\_\_

Date of second IVIG infusion (D-M-Y)

\_\_\_\_\_

Date of third IVIG infusion (D-M-Y)

\_\_\_\_\_

Date of fourth or subsequent IVIG doses

\_\_\_\_\_

What was the "other" treatment?

\_\_\_\_\_

Provide the name of each drug or therapy directed at COVID-19 and the dose and date(s).

\_\_\_\_\_

Did the patient receive corticosteroids during the time that they had COVID-19 infection or MIS-C ?

- Yes  
 No

Were corticosteroids given for MIS-C?

- Yes  
 No

Provide the name of the corticosteroid that they received, and the highest mg/kg/day given

\_\_\_\_\_

Describe any other treatment that the child received that was directed at COVID-19 or MIS-C (eg. anakinra June 4) - Put "none" if appropriate.

\_\_\_\_\_

Did the patient have symptoms of COVID-19 or MIS-C at any point?

- Yes  
 No

Date of onset of COVID-19 or MIS-C symptoms (D-M-Y)

\_\_\_\_\_

Fever

- history of fever prior to admission but afebrile in hospital  
 fever documented in hospital (+/- fever prior to admission)  
 no fever prior to or during admission

Date of first fever thought to be due to COVID-19 or MIS-C (including reports of fever at home prior to admission) (D-M-Y)

\_\_\_\_\_

Date of last fever in hospital (38.2 degrees C or higher) during COVID-19 infection or MIS-C (D-M-Y) (Ignore fevers that occurred after COVID-19 symptoms resolved if patient remained admitted for other reasons))

\_\_\_\_\_

**Signs and symptoms attributed to COVID-19 that occurred prior to or during admission**  
**(Choose "no" if not mentioned in chart)**

|                | yes                      | no                       |
|----------------|--------------------------|--------------------------|
| rash           | <input type="checkbox"/> | <input type="checkbox"/> |
| cough          | <input type="checkbox"/> | <input type="checkbox"/> |
| chest pain     | <input type="checkbox"/> | <input type="checkbox"/> |
| wheezing       | <input type="checkbox"/> | <input type="checkbox"/> |
| abdominal pain | <input type="checkbox"/> | <input type="checkbox"/> |
| diarrhea       | <input type="checkbox"/> | <input type="checkbox"/> |
| vomiting       | <input type="checkbox"/> | <input type="checkbox"/> |
| headache       | <input type="checkbox"/> | <input type="checkbox"/> |
| myalgias       | <input type="checkbox"/> | <input type="checkbox"/> |
| conjunctivitis | <input type="checkbox"/> | <input type="checkbox"/> |



|                                             |                          |                          |
|---------------------------------------------|--------------------------|--------------------------|
| rhinitis                                    | <input type="checkbox"/> | <input type="checkbox"/> |
| sore throat                                 | <input type="checkbox"/> | <input type="checkbox"/> |
| shortness of breath or respiratory distress | <input type="checkbox"/> | <input type="checkbox"/> |
| loss of sense of smell or taste             | <input type="checkbox"/> | <input type="checkbox"/> |
| edema of hands AND feet                     | <input type="checkbox"/> | <input type="checkbox"/> |
| redness of hands AND feet                   | <input type="checkbox"/> | <input type="checkbox"/> |
| peeling of fingers or toes                  | <input type="checkbox"/> | <input type="checkbox"/> |
| cracked red lips                            | <input type="checkbox"/> | <input type="checkbox"/> |
| strawberry tongue                           | <input type="checkbox"/> | <input type="checkbox"/> |
| lymph node > 1.5 cm in diameter             | <input type="checkbox"/> | <input type="checkbox"/> |
| syncope                                     | <input type="checkbox"/> | <input type="checkbox"/> |
| hepatomegaly                                | <input type="checkbox"/> | <input type="checkbox"/> |
| splenomegaly                                | <input type="checkbox"/> | <input type="checkbox"/> |
| other                                       | <input type="checkbox"/> | <input type="checkbox"/> |

Describe the rash (location and characteristics). In particular, did it involve the fingers and toes? \_\_\_\_\_

Conjunctivitis was

- purulent and bilateral  
 purulent and unilateral  
 non-purulent and bilateral  
 non-purulent and unilateral

Describe the other symptoms \_\_\_\_\_

Was there erythema, pain or swelling of the limbs during the admission?

- Yes  
 No

Describe the location of the abnormal limb findings. \_\_\_\_\_

Did they have sterile pyuria (>5 WBCs/HPF)?

- yes  
 no  
 urinalysis never done

WBC count on first CBC and diff performed after COVID-19 or MIS-C symptoms started (X 10<sup>9</sup>/L - normal is 4-10) - Do not record a value from a CBC alone - Put ND if CBC and diff never done. \_\_\_\_\_

Highest neutrophil count X 10<sup>9</sup>/L (normal is about 2-7) - Put ND if never done. \_\_\_\_\_

Lowest neutrophil count X 10<sup>9</sup>/L (normal is about 2-7). Put ND if never done. \_\_\_\_\_

Lowest Hb during COVID-19 or MIS-C symptoms in g/L (normal is about 120-160). Put ND if never done. \_\_\_\_\_

---

First platelet count measured after COVID-19 or MIS-C symptoms started (X 10<sup>9</sup>/L - normal is 150-400) - Put ND if never done.

---

Lowest platelet count measured after COVID-19 or MIS-C symptoms started (X 10<sup>9</sup>/L - normal is 150-400) - Put ND if never done.

---

Highest platelet count measured after COVID-19 or MIS-C symptoms started (X 10<sup>9</sup>/L - normal is 150-400) - Put ND if never done.

---

Were burr cells noted during time child had COVID-19 or MIS-C?

- yes  
 peripheral smear did not show burr cells  
 peripheral smear was not done
- 

Peak CRP during COVID-19 infection or MIS-C (mg/L - normal is up to 8) - Put ND if never done.

---

Lowest serum albumin (g/L 0- normal is 30-50) during COVID-19 infection or MIS-C - Put ND if never done.

---

Evidence for coagulopathy during COVID-19 infection or MIS-C:

- peak INR > 3  
 peak INR 2.0-2.9  
 peak INR 1.3-1.9  
 INR measured and always 1.2 or lower  
 INR never measured
- 

PTT during COVID-19 infection or MIS-C

- not done  
 always normal  
 at least one abnormal result
- 

Highest PTT result

---

D-dimer results during COVID-19 infection or MIS-C

- Not done  
 Always normal  
 Elevated at least once
- 

What was the highest D-dimer result?

---

Fibrinogen results during COVID-19 infection or MIS-C

- not done  
 always normal  
 at least one abnormal result
- 

Record date (D-M-Y) and result of all abnormal fibrinogen results.

---

Was the patient thought to have DIC during COVID-19 infection or MIS-C?

- Yes  
 No
- 

Which of the following was evidence for DIC (choose all that apply)?

- bleeding  
 thrombosis  
 compatible lab abnormalities
-

Describe the bleeding that was attributed to DIC (location and severity).

\_\_\_\_\_

Where were the thrombi that were attributed to DIC?

\_\_\_\_\_

Highest ALT during COVID-19 or MIS-C admission - Put ND if never done.

\_\_\_\_\_

Highest AST during COVID-19 admission - Put ND if never done.

\_\_\_\_\_

Highest total bilirubin after COVID-19 or MIS-C symptoms started (mmol/L - normal is < 25) - Put ND if never done.

\_\_\_\_\_

Lowest serum Na during COVID-19 or MIS-C illness - Put ND if never done.

\_\_\_\_\_

First ferritin level measured after COVID-19 or MIS-C symptoms started (mcg/L)

\_\_\_\_\_

Highest ferritin level measured (mcg/L) - Put ND if never done.

\_\_\_\_\_

Triglycerides - highest level in mmol/l (normal < 1.7) during COVID-19 infection or MIS-C - Put ND if never done.

\_\_\_\_\_

Highest serum creatinine during COVID-19 infection or MIS-C in  $\mu\text{mol/L}$  (normal approximately 40-90) - Put ND if never done.

\_\_\_\_\_

Highest BNP - Put ND if not done

\_\_\_\_\_

Troponin results

- not done  
 low or normal  
 elevated

Highest troponin value

\_\_\_\_\_

If any novel biomarkers were measured during COVID-19 infection or MIS-C, provide name of test, date and result - Put ND if never done.

\_\_\_\_\_

Did the child have a neurological complication (e.g. spinal cord, brain or optic nerve problem, as evidenced by seizure, encephalopathy, dystonia, chorea, athetosis, hemiparesis and/or abnormal CSF) ?

- Yes  
 No

Echocardiogram results

- not done  
 all echos normal or showed chronic findings judged to be unrelated to COVID-19  
 echo showed changes assumed to be acute

Describe the abnormal echo findings. If there were coronary aneurysms, specify the diameter of the largest one.

---

Does the child have a history of thrombosis prior to their COVID-19 infection or MIS-C?

- Yes  
 No

Which of the following types of thrombosis did the child have in the past (Select all that apply)?

- deep venous thrombosis  
 arterial thrombosis  
 stroke  
 intravascular catheter-related thrombosis on imaging  
 pulmonary embolism  
 superficial thrombosis  
 cardiac thrombosis

Did the patient develop new thrombosis during their COVID-19 or MIS-C admission?

- Yes  
 No

What type of thrombosis did the patient develop?

- deep venous thrombosis  
 arterial thrombosis  
 stroke  
 intravascular catheter-related thrombosis on imaging  
 pulmonary embolism  
 superficial thrombosis  
 cardiac thrombosis

Was the child known to have a clotting disorder prior to COVID-19 infection or MIS-C?

- Yes  
 No

What type of clotting disorder was the child known to have?

- Factor V Leiden  
 Prothombin gene mutation  
 Protein C deficiency  
 Protein S deficiency  
 Antithrombin III deficiency  
 Hyperhomocysteinemia  
 Antiphospholipid antibodies  
 Other

Was the child known to have a bleeding disorder prior to COVID-19 infection (ore MIS-C)?

- Yes  
 No

What type of bleeding disorder was the child known to have?

- Hemophilia A  
 Hemophilia B  
 Other factor deficiency  
 Von Willebrand disease  
 Platelet dysfunction  
 Other

Did the child develop any evidence for bleeding during their COVID-19 or MIS-C admission (including epistaxis or stool positive for occult blood)?

- Yes  
 No

Where was the bleeding from and did it require blood products?

---

Did the child receive any blood products (excluding IVIG) for COVID-19 or MIS-C during this admission?

- Yes  
 No

What is the child's blood group?

O  
 A  
 B  
 AB  
 unknown

Which of the following did the child require during their COVID-19 or MIS-C admission (typically as treatment for bleeding/ thrombosis)?

none  
 red blood cells  
 platelets  
 FFP  
 cryoprecipitate/ Riastat  
 prothrombin concentrates  
 fibrinogen concentrates  
 tranexamic acid/ antifibrinolytics (given for DIC)  
 surgery to stop bleeding  
 catheter directed thrombolysis  
 unfractionated heparin  
 low molecular weight heparin  
 warfarin  
 TPA (alteplase)  
 other anticoagulants such as direct oral anticoagulants

What prophylactic anticoagulation measures did the child receive?

none  
 unfractionated heparin  
 low molecular weight heparin  
 direct oral anticoagulants  
 aspirin

Need for central venous line (including PICC) - Choose all that apply

present at admission  
 new one inserted during admission  
 not required

List and provide details for any other possible complications of COVID-19 infection or its treatment and provide details (eg. ARDS, acute kidney injury, myocarditis, etc). This should include any abnormal laboratory or radiographic result that was attributed to COVID-19 infection and could be clinically significant. (eg. hepatitis with peak ALT 1244, AST 1200, bili 316 on May 7 attributed to drug X; acute renal failure with peak Cr 345 requiring CRRT for May 6-15 attributed to shock; intravascular catheter infection due to CONS that resolved with vancomycin June 16-26; evidence for a thrombus at site of central venous line)

---

Did the patient travel outside Canada within the 14 days prior to symptom onset?

yes  
 no  
 unknown

When did they travel and where did they go?

---

Did the child have contact with a person with proven COVID-19 infection prior to symptom onset? (If not documented, choose "no").

Yes  
 No

Date(s) of exposure and relationship of contact to the child (parent/ sibling/ other household contact, etc)

Add any other comments that you think are relevant (For example if the clinical course is not adequately captured or if the virology lab did extra studies or provided you with the crossing threshold (CT) value for the molecular test)

### A. Neurologic exam

Check all new symptoms that the child had that were thought to be related to COVID-19 infection or MIS-C (including post-infectious complications)

- Seizures
- Lethargy
- Severe encephalopathy
- Behavioural/Personality Change
- Irritability
- Dyskinesia
- Altered Mental Status
- Speech Impairment
- Psychosis
- Ataxia
- Other

What other symptoms did the child have?

Clinical Disability Rating Scales

Modified Rankin Scale

- 0-No symptoms at all
- 1-No significant disability despite symptoms
- 2-Slight disability; unable to carry out all previous activities
- 3-Moderate disability requiring some help
- 4-Moderate severe disability; unable to walk without assistance
- 5-Severe Disability; bedridden and requiring constant care and attention
- Unknown

Indicate which of the following were detected after the onset of COVID-19 infection (check all that apply)

- Facial weakness
- Hearing loss
- Dysarthria
- Dysphagia
- Truncal weakness
- Neck weakness
- None of the above
- Other (please specify below)

Neurologic assessment - other symptoms:

Did gait become abnormal during or after COVID-19 infection?

- Yes
- No

Was there muscle weakness in the limbs?

- Yes
- No
- Unknown

---

Which limb(s) is affected?

- Right arm  
 Left arm  
 Right leg  
 Left leg
- 

Indicate degree of weakness in Right Arm

- 0-No movement at all  
 1-Only a trace or flicker of movement is seen or felt  
 2- Muscle can move only if the resistance of gravity is removed (e.g. the elbow can be fully flexed if the arm is kept in horizontal position)  
 3-Muscle can move against gravity (e.g. the elbow can move from full extension to full flexion starting with the arm hanging down at side of body)  
 4- Muscle strength is reduced but essentially normal  
 5- Normal strength  
 Unknown
- 

Indicate degree of weakness Left Arm

- 0-No movement at all  
 1-Only a trace or flicker of movement is seen or felt  
 2- Muscle can move only if the resistance of gravity is removed (e.g. the elbow can be fully flexed if the arm is kept in horizontal position)  
 3-Muscle can move against gravity (e.g. the elbow can move from full extension to full flexion starting with the arm hanging down at side of body)  
 4- Muscle strength is reduced but essentially normal  
 5- Normal strength  
 Unknown
- 

Indicate degree of weakness in Right Leg

- 0-No movement at all  
 1-Only a trace or flicker of movement is seen or felt  
 2- Muscle can move only if the resistance of gravity is removed (e.g. the elbow can be fully flexed if the arm is kept in horizontal position)  
 3-Muscle can move against gravity (e.g. the elbow can move from full extension to full flexion starting with the arm hanging down at side of body)  
 4- Muscle strength is reduced but essentially normal  
 5- Normal strength  
 Unknown
- 

Indicate degree of weakness in Left Leg

- 0-No movement at all  
 1-Only a trace or flicker of movement is seen or felt  
 2- Muscle can move only if the resistance of gravity is removed (e.g. the elbow can be fully flexed if the arm is kept in horizontal position)  
 3-Muscle can move against gravity (e.g. the elbow can move from full extension to full flexion starting with the arm hanging down at side of body)  
 4- Muscle strength is reduced but essentially normal  
 5- Normal strength  
 Unknown

Was there sensory abnormality in the limbs (eg. to touch, pain, proprioception, etc)?

Yes  
 No  
 Unknown

Indicate which limb(s) and severity (mild, moderate, severe)  
 E.g. Right arm-moderate

\_\_\_\_\_

Was there cerebellar abnormality (eg. Incoordination of movement, impaired articulation, tremor, etc)?

Yes  
 No  
 Unknown

Indicate severity

Mild  
 Moderate  
 Severe  
 Unknown

Changes in bowel and bladder function during or after COVID-19 infection

None  
 Mild deficit  
 Moderate deficit  
 Major loss of function

Any other comments on changes in neurologic function during or after COVID-19 infection

\_\_\_\_\_

### C. Laboratory Data - CSF

Was CSF obtained?

Yes  
 No

Date of CSF testing (record results of the one with the highest number of WBCs if more than one CSF was obtained)

\_\_\_\_\_

WBC (cells/mm<sup>3</sup>)

\_\_\_\_\_

% Neutrophils

\_\_\_\_\_

Protein (mg/dL)

\_\_\_\_\_

RBC (mm<sup>3</sup>)

\_\_\_\_\_

% Monocytes

\_\_\_\_\_

% Lymphocytes

\_\_\_\_\_

Glucose (mmol/L)

\_\_\_\_\_



Oligoclonal Bands in CSF

- Yes  
 No  
 Not Done

Opening Pressure

\_\_\_\_\_

**D. Neuroimmunologic Test Results**

Was immunologic testing performed? If yes, please select test(s):

- Anti-MOG antibody  
 Anti-NMO (aquaporin 4) antibody  
 Anti-NMDA receptor antibody (CSF)  
 Anti-NMDA receptor antibody (SERUM)  
 Autoimmune encephalitis panel (CSF)  
 Autoimmune encephalitis panel (SERUM)  
 Other immunology test (please specify below)  
 No immunology testing done

Anti-MOG antibody

- Positive  
 Negative  
 Equivocal

Test Date

\_\_\_\_\_

Anti-MOG antibody titer (If unknown/not determined, enter 'Unknown')

\_\_\_\_\_

Anti-NMO antibody

- Positive  
 Negative  
 Equivocal

Test Date

\_\_\_\_\_

Anti-NMO antibody titer (If unknown/not determined, enter 'Unknown')

\_\_\_\_\_

Anti-NMDAr antibody (CSF)

- Positive  
 Negative  
 Equivocal

Test Date

\_\_\_\_\_

Anti-NMDAr antibody (SERUM)

- Positive  
 Negative  
 Equivocal

Test Date

\_\_\_\_\_

Autoimmune encephalitis panel (CSF)

- Positive (Specify below)  
 Negative  
 Equivocal

---

Test Date

\_\_\_\_\_

---

List antibodies detected:

\_\_\_\_\_

---

Autoimmune encephalitis panel (SERUM)

- Positive (Specify below)
- Negative
- Equivocal

---

Test Date

\_\_\_\_\_

---

List antibodies detected:

\_\_\_\_\_

---

Specify antibody testing performed

\_\_\_\_\_

---

Test Date

\_\_\_\_\_

---

Sample type

- Serum
- CSF

---

Result

- No autoantibody detected
- Autoantibodies detected (Specify below)

---

List antibodies detected:

\_\_\_\_\_

---

Add antibody test

- Yes

---

Specify antibody test performed

\_\_\_\_\_

---

Test Date

\_\_\_\_\_

---

Sample type

- Serum
- CSF

---

Result

- No autoantibody detected
- Autoantibodies detected (Specify below)

---

List antibodies detected:

\_\_\_\_\_

**E. Brain MRI**

Brain MRI performed?  Yes  
 No  
 Unknown

Date of Study \_\_\_\_\_

Was Gadolinium (contrast) agent used?  Yes  
 No  
 Unknown

Any Supratentorial lesion?  Lobe  
 Cortical  
 Subcortical  
 Basal ganglia  
 Thalamic  
 None

Any gadolinium (contrast) enhancing supratentorial lesion?  Yes  
 No  
 Unknown

Any Brainstem lesions?  Midbrain  
 Pons  
 Medulla  
 Cerebellar  
 None

Any gadolinium (contrast) enhancing brainstem lesion?  Yes  
 No  
 Unknown

Any Cranial Nerve lesions?  Yes  
 No  
 Unknown

Any gadolinium (contrast) enhancing cranial nerve lesions?  Yes  
 No  
 Unknown  
 Not applicable

Specific which cranial nerves (CN) are affected? \_\_\_\_\_

Was there cerebral atrophy?  Yes  
 No  
 Unknown

Was there cerebellar atrophy?  Yes  
 No  
 Unknown

Other significant findings & comments \_\_\_\_\_

**F. Spine MRI**

Spine MRI performed?  Yes  
 No  
 Unknown

Date of study \_\_\_\_\_

Was Gadolinium (contrast) agent used?  Yes  
 No  
 Unknown

Specify location of spinal cord lesions:  
 Cervical cord  
 Thoracic cord  
 Conus  
 Cauda equina  
 Unknown  
 No spinal cord lesion documented

Levels of cord affected  
 C1  
 C2  
 C3  
 C4  
 C5  
 C6  
 C7  
 C8  
 T1  
 T2  
 T3  
 T4  
 T5  
 T6  
 T7  
 T8  
 T9  
 T10  
 T11  
 T12  
 L1  
 L2  
 Not documented/Unknown

What areas of cord were affected  
 Predominantly grey matter  
 Predominantly white matter  
 Both equally affected  
 Unknown  
 None

Was there cord swelling?  Yes  
 No  
 Unknown

Any gadolinium (contrast) enhancing cord lesions?  
 No enhancing lesion  
 Lesion  
 Nerve roots  
 Cauda equina  
 Unknown

---

Other significant findings & comments

---

**G. Repeat Brain MRI (done < 30 days of admission)**

Was a repeat brain MRI performed?

Yes  
 No  
 Unknown

---

Date of Study

---

Was Gadolinium (contrast) agent used?

Yes  
 No  
 Unknown

Any supratentorial lesion?

Lobe  
 Cortical  
 Subcortical  
 Basal ganglia  
 Thalamic  
 None

Any Gadolinium (contrast) enhancing supratentorial lesions?

Yes  
 No  
 Unknown

Any brainstem lesions?

Midbrain  
 Pons  
 Medulla  
 Cerebellar  
 None

Any gadolinium (contrast) enhancing brainstem lesions?

Yes  
 No  
 Unknown

Any Cranial Nerve lesions?

Yes  
 No  
 Unknown

Any Gadolinium (contrast) enhancing Cranial Nerve lesions?

Yes  
 No  
 Unknown

Specify which cranial nerves are affected

---

Cerebral atrophy

Yes  
 No  
 Unknown

Cerebellar atrophy

Yes  
 No  
 Unknown

---

Other significant findings & comments

---

**H. Repeat Spine MRI (done < 30 days of admission)**

Repeat Spine MRI performed?  Yes  
 No  
 Unknown

---

Date of study

---

Was Gadolinium (contrast) agent used?  Yes  
 No  
 Unknown

Indication location of lesions  Cervical cord  
 Thoracic cord  
 Conus  
 Cauda equina  
 Unknown  
 None

Levels of cord affected  C1  
 C2  
 C3  
 C4  
 C5  
 C6  
 C7  
 C8  
 T1  
 T2  
 T3  
 T4  
 T5  
 T6  
 T7  
 T8  
 T9  
 T10  
 T11  
 T12  
 L1  
 L2  
 Not documented/Unknown

What areas of cord were affected  Predominantly grey matter  
 Predominantly white matter  
 Both equally affected  
 Unknown  
 None

Was there cord swelling?  Yes  
 No  
 Unknown

---

Any enhancing cord lesions?

- No enhancing lesion  
 Lesion  
 Nerve roots  
 Cauda equina  
 Unknown
- 

Other significant findings & comments

---

## J. EEG

EEG done?

- Yes  
 No  
 Unknown
- 

Date of EEG 1

---

EEG findings scan 1

- Slowing-generalized  
 Slowing-focal  
 Focal epileptiform activity  
 Delta brush  
 Generalized epileptiform  
 Other
- 

Significant EEG findings

---

Add another EEG

- Yes
- 

Date of EEG 2

---

EEG findings scan 2

- Slowing-generalized  
 Slowing-focal  
 Focal epileptiform activity  
 Delta brush  
 Generalized epileptiform  
 Other
- 

Significant EEG findings

---

Add another EEG

Yes

---

Date of EEG 3

---

EEG findings scan 3

- Slowing-generalized
  - Slowing-focal
  - Focal epileptiform activity
  - Delta brush
  - Generalized epileptiform
  - Other
- 

Significant EEG findings

---

Add another EEG

Yes

---

Date of EEG 4

---

EEG findings scan 4

- Slowing-generalized
  - Slowing-focal
  - Focal epileptiform activity
  - Delta brush
  - Generalized epileptiform
  - Other
- 

Significant EEG findings

---

## **K. Seizures**

New seizure onset

Yes

---

Seizure presentation date

---



---

Seizure frequency at presentation

---

---

Status epilepticus at presentation

- Yes  
 No  
 Unknown
- 

Received anticonvulsant treatment?

- Yes
- 

Anticonvulsant treatment 1

---

Dose - anticonvulsant treatment 1

---

Start date - anticonvulsant treatment 1

---

End date - anticonvulsant treatment 1

---

Seizure frequency after anticonvulsant treatment 1

---

Add anticonvulsant treatment 2

- Yes
- 

Specify anticonvulsant treatment 2

---

Dose - anticonvulsant treatment 2

---

Start date - anticonvulsant treatment 2

---

---

End date - anticonvulsant treatment 2

---

---

Seizure frequency after anticonvulsant treatment 2

---

---

Add anticonvulsant treatment 3

Yes

---

Specify anticonvulsant treatment 3

---

---

Dose - anticonvulsant treatment 3

---

---

Start date - anticonvulsant treatment 3

---

---

End date - anticonvulsant treatment 3

---

---

Seizure frequency after anticonvulsant treatment 3

---

---

Add anticonvulsant treatment 4

Yes

---

Specify anticonvulsant treatment 4

---

---

Dose - anticonvulsant treatment 4

---

---

Start date - anticonvulsant treatment 4

---

---

End date - anticonvulsant treatment 4

---

---

Seizure frequency after anticonvulsant treatment 4

---

---

### L. Evaluation at Hospital Discharge

---

Has patient returned to baseline at discharge?

- Yes  
 No  
 Not applicable (patient has not been discharged)  
 Unknown
- 

Please describe any residual symptoms at hospital discharge

---

Modified Rankin Scale (at discharge)

- 0-No symptoms at all  
 1-No significant disability despite symptoms  
 2-Slight disability; unable to carry out all previous activities  
 3-Moderate disability requiring some help  
 4-Moderate severe disability; unable to walk without assistance  
 5-Severe Disability; bedridden and requiring constant care and attention  
 Unknown
- 

Signing Qualified Investigator

---

Qualified Investigator Name

---

Date of Signature

---
